# Supplementary material for: Electronic band structure change with structural transition of buckled Au2X monolayers induced by strain
Source: Royal Society of Chemistry journal article supplement (doi:10.1039/d3cp03135g), 2024-01-01
Supplement: d3cp03135g1.pdf [file d3cp03135g1.pdf]

# Supplemental Information of “Electronic band structure change with structural transition of buckled $\text{Au}_2\text{X}$ monolayers induced by strain”

Masahiro Fukuda<sup>\*a</sup> and Taisuke Ozaki<sup>b</sup>

---

<sup>1</sup> <sup>a</sup> *Institute for Solid State Physics, The University of Tokyo, 5-1-5 Kashiwanoha, Kashiwa, Chiba 277-8581, Japan. E-mail: [masahiro.fukuda@issp.u-tokyo.ac.jp](mailto:masahiro.fukuda@issp.u-tokyo.ac.jp)*

<sup>2</sup> <sup>b</sup> *Institute for Solid State Physics, The University of Tokyo, 5-1-5 Kashiwanoha, Kashiwa, Chiba 277-8581, Japan*

## S1. SUPPLEMENTAL INFORMATION

In Sec. S1 A, figures and tables about  $\text{Au}_2\text{S}$  are shown. We show the convergence of energy and lattice length for the number of k-mesh and energy cutoff in Table S1 and S2. The Table S3 shows the function types for CB2, CB1, VB1 and VB2. The electronic band structures and DOSs of  $\text{Au}_2\text{S}$  and their decomposed results are shown in Fig. S1 - S3. The Figs. S4 and S5 show molecular orbitals of VB2, VB1, CB1, and CB2 at the  $\Gamma$  point.

In Sec. S1 B, figures and tables about  $\text{Au}_2\text{X}$  ( $\text{X}=\text{S}, \text{Se}, \text{Te}, \text{Si}, \text{Ge}$ ) and  $\text{Au}_4\text{SSe}$  are shown. The phonon bands are shown in Figs. S6 and S7. The energy curves, electronic band structures, and optical conductivities are shown in Figs. S8 - S11.

### A. $\text{Au}_2\text{S}$ monolayers

TABLE S1: Convergence of energy for the number of k-mesh and energy cutoff  $E_{\text{cut}}$ .

| k-mesh                | $E_{\text{cut}}$ [Ry] | Energy [a.u.]              |                              |                     |
|-----------------------|-----------------------|----------------------------|------------------------------|---------------------|
|                       |                       | $\eta\text{-Au}_2\text{S}$ | $\theta\text{-Au}_2\text{S}$ | $E_\theta - E_\eta$ |
| $5 \times 5 \times 1$ | 240                   | -443.3502                  | -443.3477                    | 0.0026              |
| $7 \times 7 \times 1$ | 240                   | -443.3505                  | -443.3484                    | 0.0021              |
| $5 \times 5 \times 1$ | 320                   | -443.3511                  | -443.3483                    | 0.0028              |
| $7 \times 7 \times 1$ | 320                   | -443.3514                  | -443.3491                    | 0.0023              |
| $9 \times 9 \times 1$ | 600                   | -443.3534                  | -443.3516                    | 0.0018              |

TABLE S2: Convergence of lattice length for the number of k-mesh and energy cutoff  $E_{\text{cut}}$ .

| k-mesh                | $E_{\text{cut}}$ [Ry] | Lattice length [ $\text{\AA}$ ] |                              |
|-----------------------|-----------------------|---------------------------------|------------------------------|
|                       |                       | $\eta\text{-Au}_2\text{S}$      | $\theta\text{-Au}_2\text{S}$ |
| $5 \times 5 \times 1$ | 240                   | 5.805                           | 5.610                        |
| $9 \times 9 \times 1$ | 600                   | 5.803                           | 5.605                        |

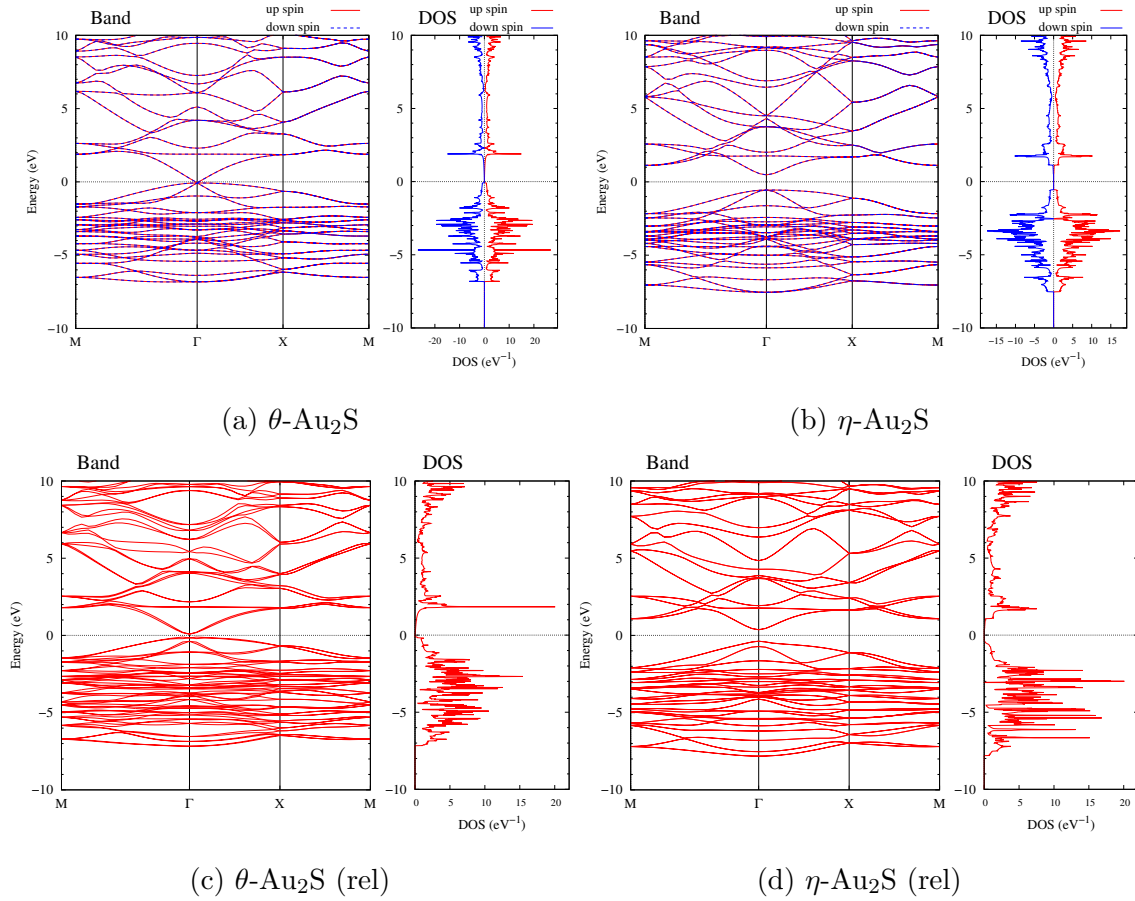

FIG. S1: Electronic band structures and DOSs of  $\text{Au}_2\text{S}$  monolayers based on non-relativistic DFT (a,b) and that with spin-orbit coupling term (c,d). Non-relativistic DFT calculations also include relativistic effect in the pseudopotentials. The  $y$  axis is taken so that the Fermi energy is zero.

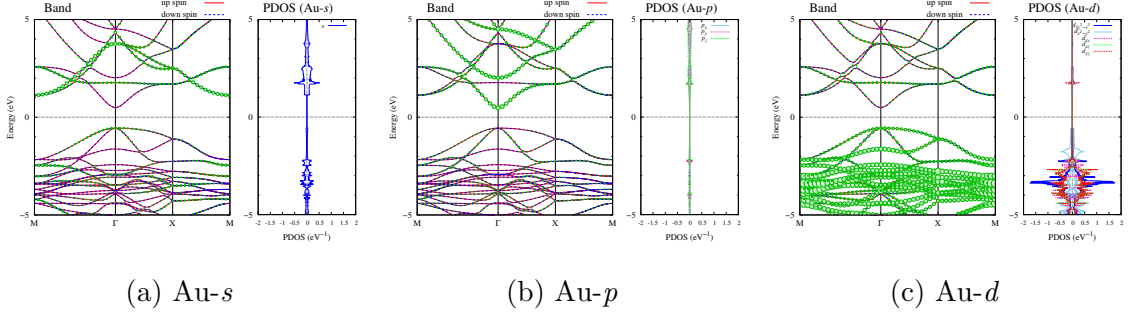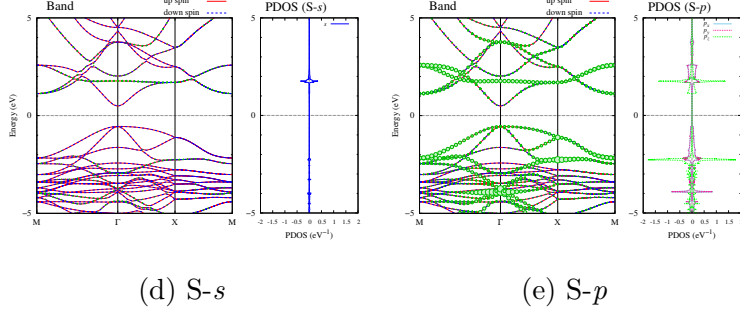

FIG. S2: Weight of the electronic band and partial DOS of Au and S atoms of *buckled- $\eta$ -Au<sub>2</sub>S* monolayers. The weight is projected on *s*, *p* and *d* type functions.

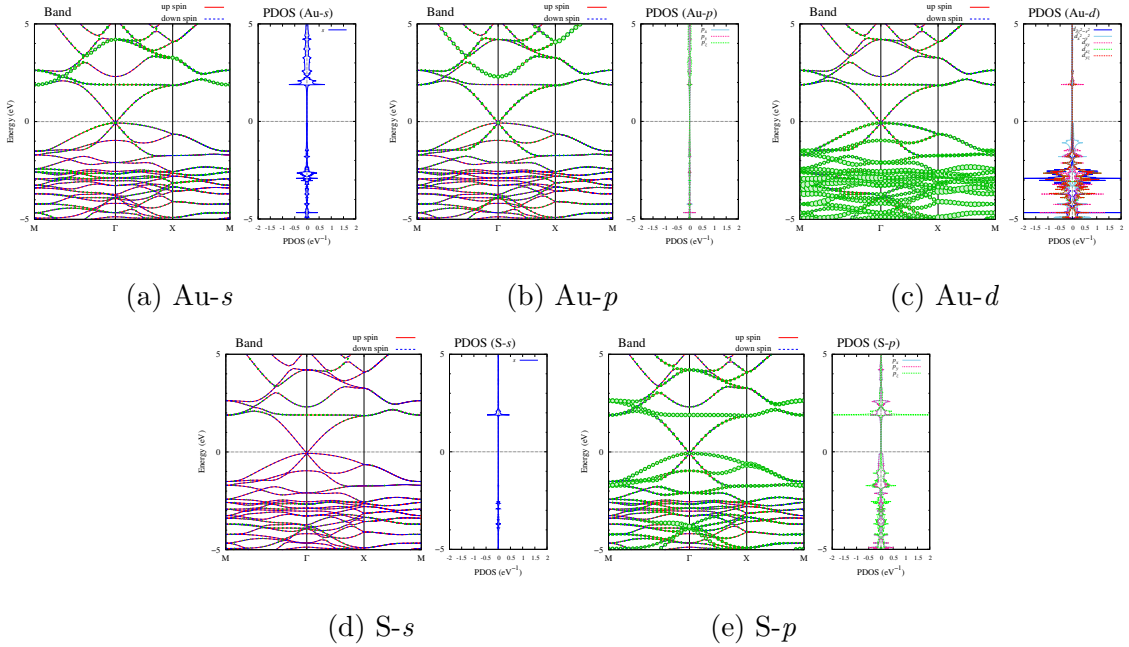

FIG. S3: Weight of the electronic band and partial DOS of Au and S atoms of *buckled- $\theta$ -Au<sub>2</sub>S* monolayers. The weight is projected on *s*, *p* and *d* type functions.

TABLE S3: Function types for each band.

| Band Function Types |                        |
|---------------------|------------------------|
| CB2                 | Au- $s,d$ , S- $p_z$   |
| CB1                 | Au- $p_x,p_y$          |
| VB1                 | Au- $d$ , S- $p_x,p_y$ |
| VB2                 | Au- $d$ , S- $p_x,p_y$ |

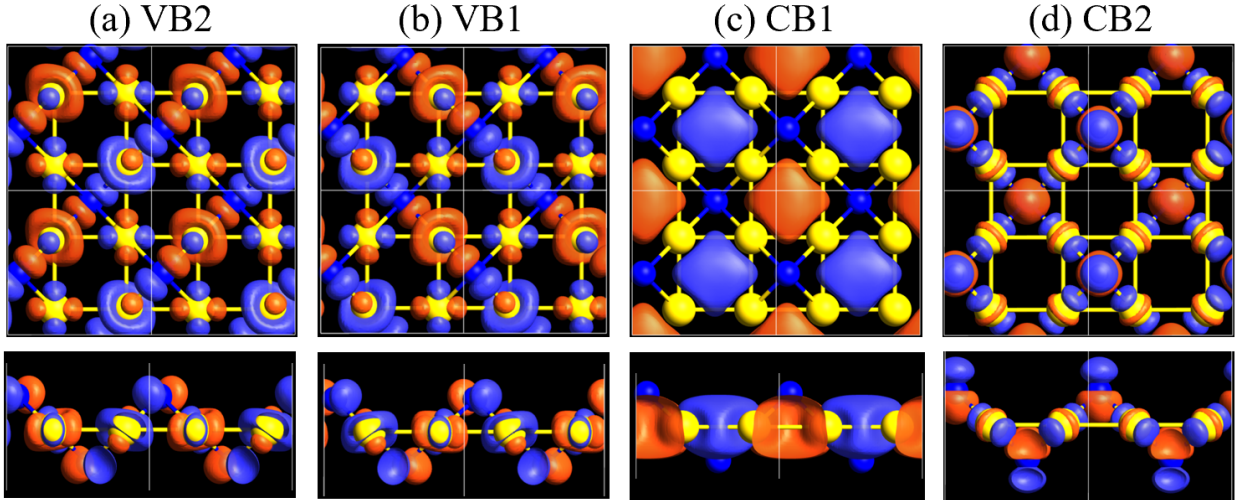

FIG. S4: Molecular orbitals (MO) of VB2, VB1, CV1, and CV2 of *buckled- $\eta$ -Au<sub>2</sub>S* monolayers at  $\Gamma$  point. The threshold value of isosurfaces of the MOs is taken as 0.04 a.u. .

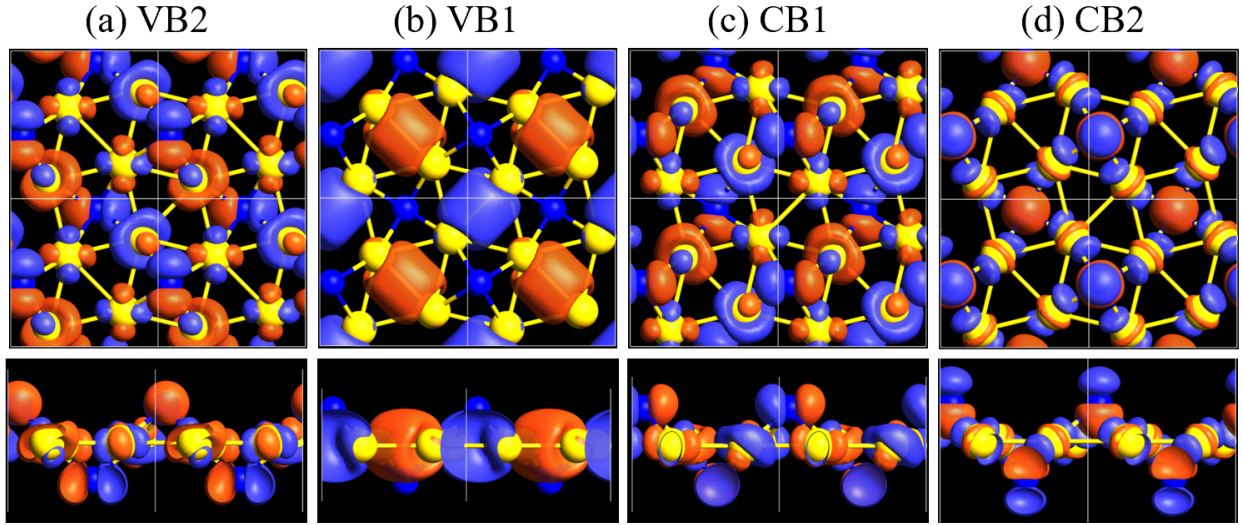

FIG. S5: Molecular orbitals (MO) of VB2, VB1, CV1, and CV2 of *buckled- $\theta$ -Au<sub>2</sub>S* monolayers at  $\Gamma$  point. The threshold value of isosurfaces of the MOs is taken as 0.04 a.u. . The CB1, VB1 and VB2 are almost degenerate at  $\Gamma$  point.

## B. $\text{Au}_2\text{X}$ monolayers

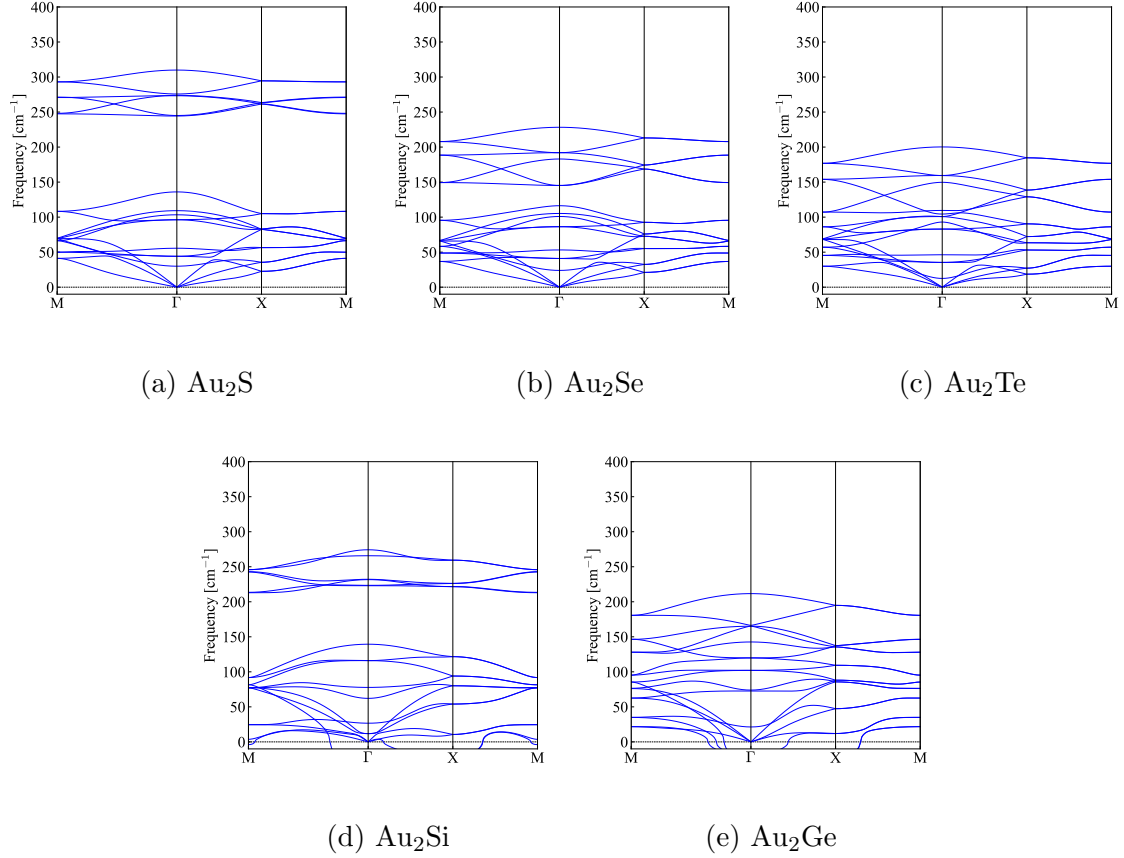

FIG. S6: Phonon band of *buckled- $\eta$ - $\text{Au}_2\text{X}$*  ( $\text{X}=\text{S}, \text{Se}, \text{Te}, \text{Si}, \text{Ge}$ ). The phonon band is calculated based on the partition method. We applied the  $r^{-4}$  weight for atoms in the region  $0.4r_{\text{inner}} < r < r_{\text{outer}}$  to obtain proper results.

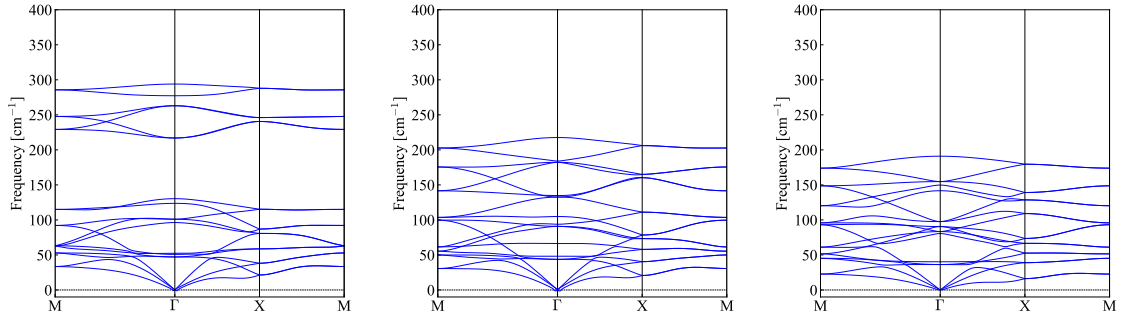(a) Au<sub>2</sub>S(b) Au<sub>2</sub>Se(c) Au<sub>2</sub>Te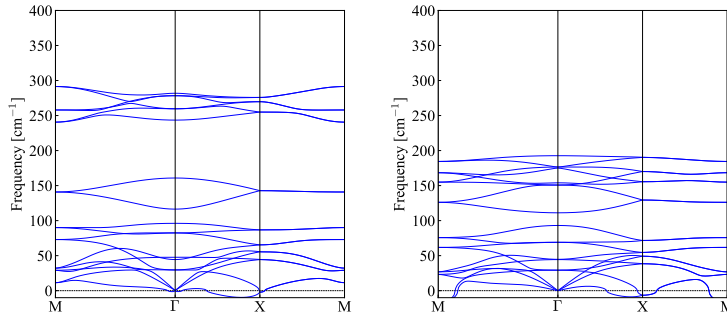(d) Au<sub>2</sub>Si(e) Au<sub>2</sub>Ge

FIG. S7: Phonon band of *buckled- $\theta$ -Au<sub>2</sub>X* (X=S, Se, Te, Si, Ge). The phonon band is calculated based on the partition method. We applied the  $r^{-4}$  weight for atoms in the region  $0.4r_{\text{inner}} < r < r_{\text{outer}}$  to obtain proper results. For Au<sub>2</sub>S and Au<sub>2</sub>Se, we applied the  $r^{-3}$  weight to obtain proper results.



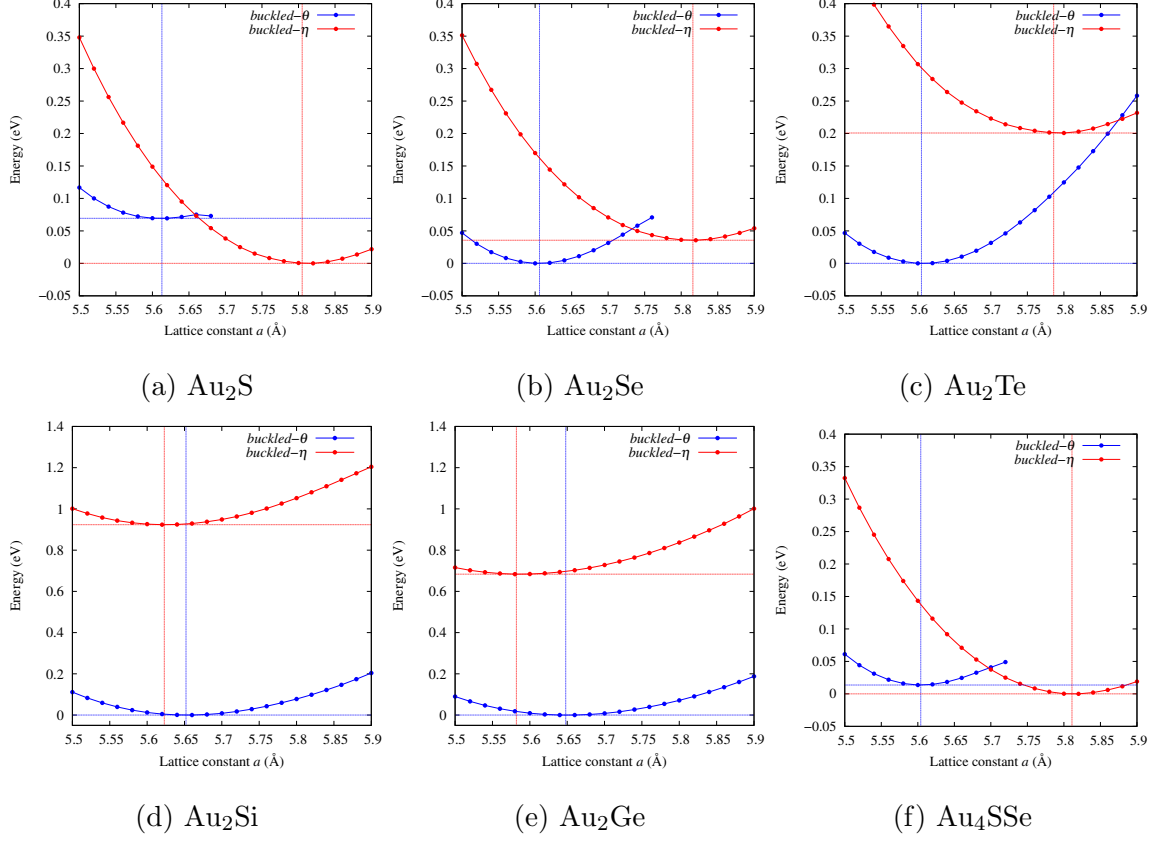

FIG. S8: Energy curve of *buckled- $\eta$* - and *buckled- $\theta$* -  $\text{Au}_2\text{X}$  ( $\text{X}=\text{S}, \text{Se}, \text{Te}, \text{Si}, \text{Ge}$ ) and  $\text{Au}_4\text{SSe}$  monolayers. The red (blue) line represents the energy curve of  $\eta$ -phase ( $\theta$ -phase).

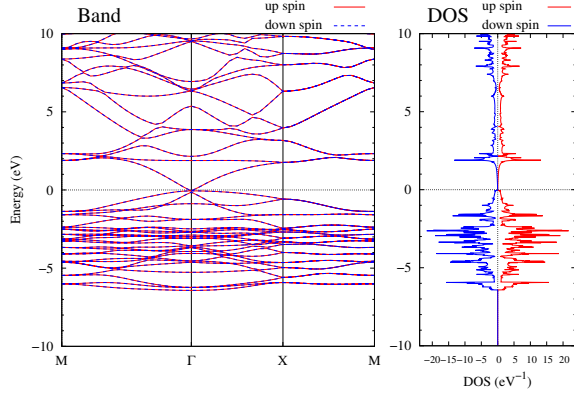

(a) *buckled- $\theta$ -Au<sub>2</sub>Se*

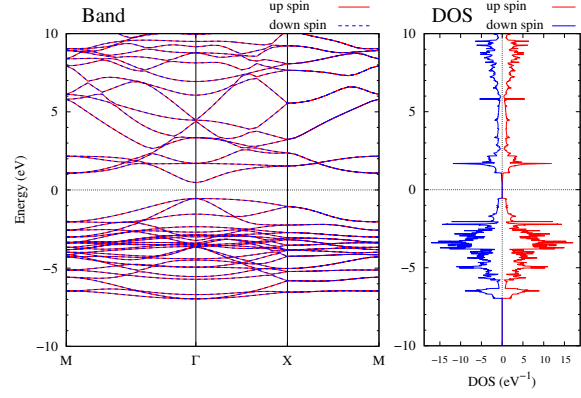

(b) *buckled- $\eta$ -Au<sub>2</sub>Se*

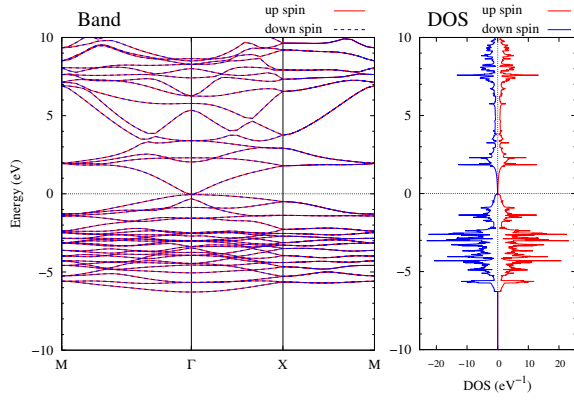

(c) *buckled- $\theta$ -Au<sub>2</sub>Te*

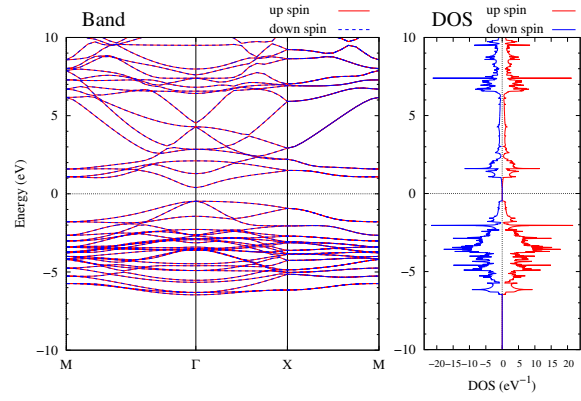

(d) *buckled- $\eta$ -Au<sub>2</sub>Te*

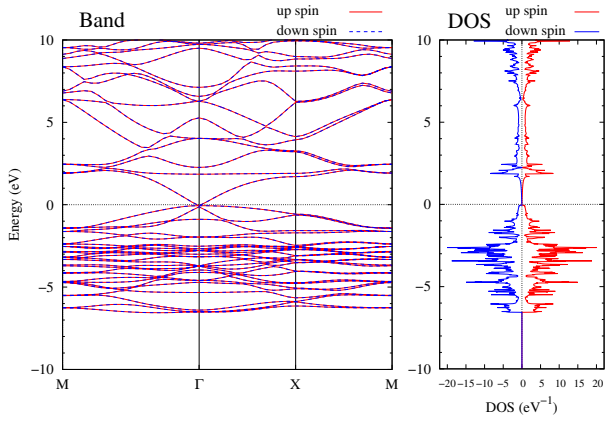

(e) *buckled- $\theta$ -Au<sub>4</sub>SSe*

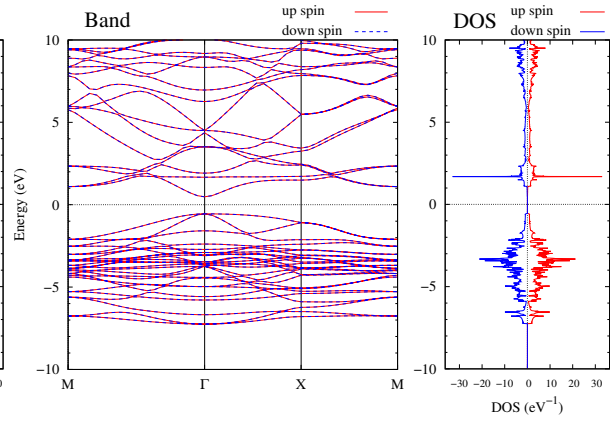

(f) *buckled- $\eta$ -Au<sub>4</sub>SSe*

FIG. S9: Electronic band and DOS of Au<sub>2</sub>X (X=Se, Te) and Au<sub>4</sub>SSe monolayers.

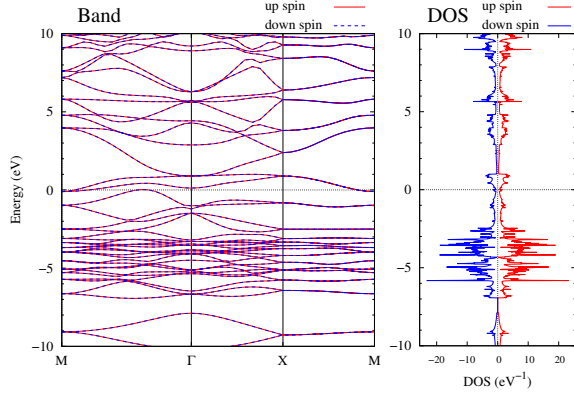

(a) *buckled- $\theta$ -Au<sub>2</sub>Si*

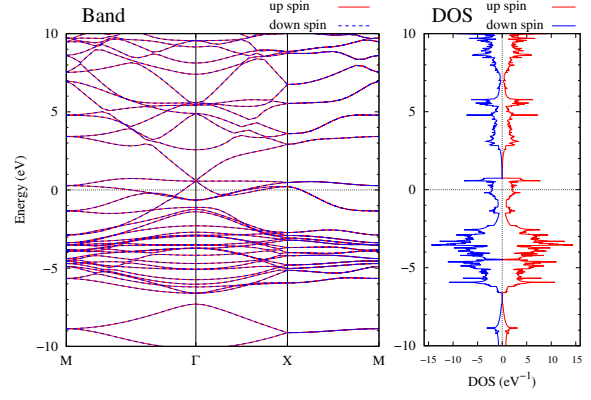

(b) *buckled- $\eta$ -Au<sub>2</sub>Si*

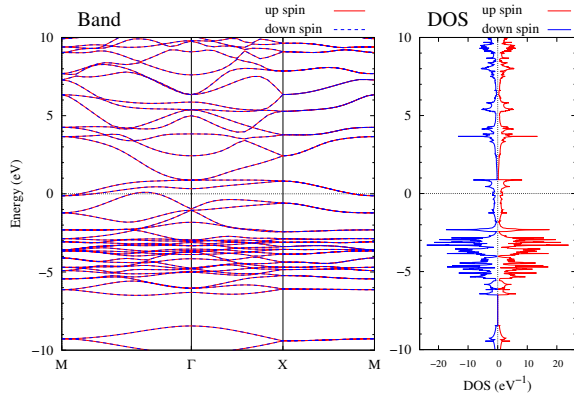

(c) *buckled- $\theta$ -Au<sub>2</sub>Ge*

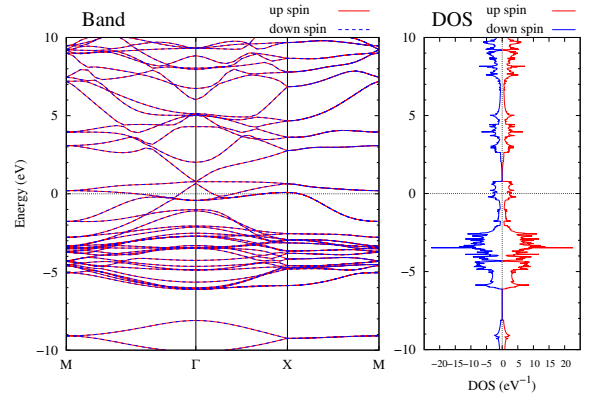

(d) *buckled- $\eta$ -Au<sub>2</sub>Ge*

FIG. S10: Electronic band and DOS of Au<sub>2</sub>X (X=Si, Ge) monolayers.

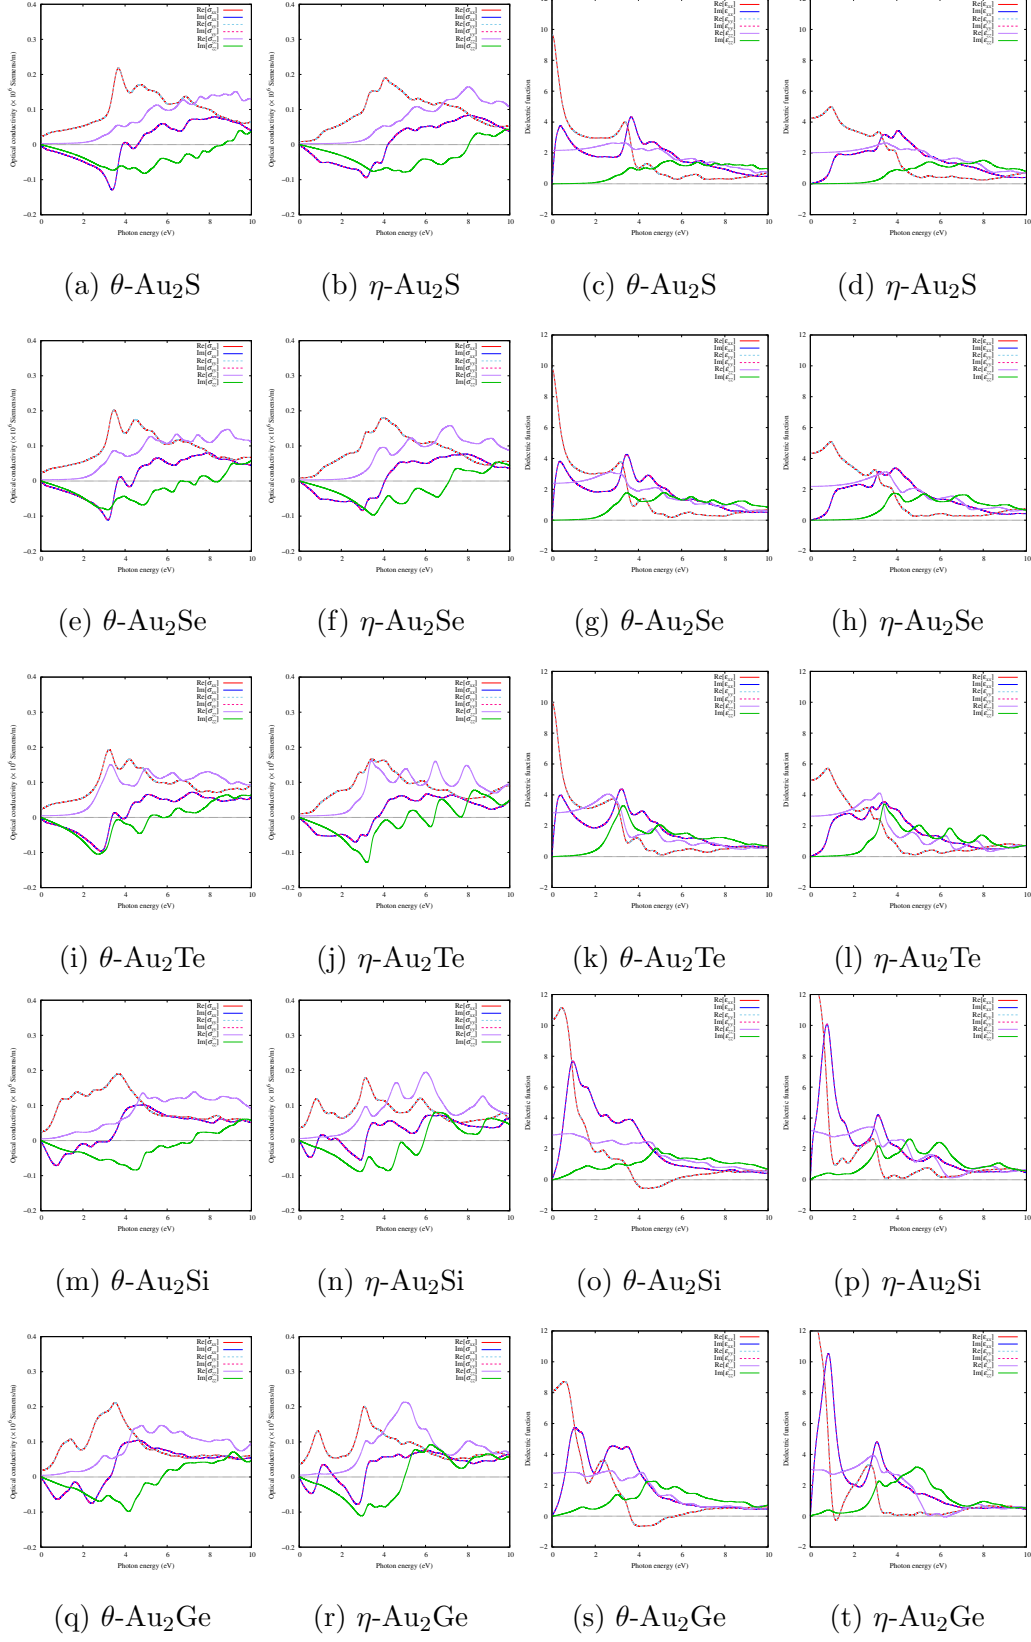

FIG. S11: Optical conductivities (left two columns) and dielectric functions (right two columns) of Au<sub>2</sub>X (X=S, Se, Te, Si, Ge) monolayers.
